1 Genotyping of *Salmonella* spp. on the basis of CRISPR (Clustered Regularly Interspaced Short  
2 Palindromic Repeats).

3 Calvin Jiksing<sup>1</sup>, Normah Yusop<sup>2</sup>, Farhan Nazaie Nasib<sup>1</sup>, Kenneth Francis Rodrigues<sup>1\*</sup>

4 <sup>1</sup>Biotechnology Research Institute, Universiti Malaysia Sabah, 88400, Kota Kinabalu, Sabah, Malaysia

5 <sup>2</sup>Diagnostic Veterinary Laboratory, 88999, Kota Kinabalu, Sabah, Malaysia

6 \*Corresponding author: Kenneth Francis Rodrigues, Biotechnology Research Institute, Universiti

7 Malaysia Sabah, 88400, Kota Kinabalu, Sabah, Malaysia, +6016-8062752 (h/p), 320993 (fax),

8 kennethr@ums.edu.my

9 Co-author: Normah Yusop, Diagnostic Veterinary Laboratory, 88999, Kota Kinabalu, Sabah, Malaysia,

10 (h/p), (fax), Normah.Yusop@sabah.gov.my

11 Co-author: Farhan Nazaie Nasib, Biotechnology Research Institute, Universiti Malaysia Sabah, 88400,

12 Kota Kinabalu, Sabah, Malaysia, +6011-20701995 (h/p), farhannazaie12@gmail.com

### 13 **ABSTRACT**

14 **Aims:** Bacterial genotyping on the basis of the CRISPR array has been established in *Mycobacterium*  
15 *tuberculosis* with a method called spacer oligonucleotide typing (spoligotyping). The spoligotyping  
16 method had been widely used for both detection and typing of *M. tuberculosis* complex bacteria.  
17 This present study aimed at determining if the CRISPR array in *Salmonella* spp. could be applied to  
18 establish a correlation between serogroup and the fingerprint generated by CRISPR typing.

19 **Methodology and results:** A total of 30 samples were obtained from Diagnostic Veterinary  
20 Laboratory, Kota Kinabalu, Sabah. Serogroup was determined on the basis of ELISA (enzyme-linked  
21 immunosorbent assay). Four different serogroups were identified which were serogroup B, C, D, and  
22 E. DNA (deoxyribonucleic acid) was extracted and PCR (polymerase chain reaction) was performed  
23 using primers which were designed to amplify the CRISPR array in *Salmonella* genome. Our results

24 indicate that there is a correlation between serogroup obtained using ELISA and the profile  
25 generated by CRISPR typing.

26 **Conclusion, significance and impact of study:** CRISPR typing has the potential to be applied for the  
27 genotyping of *Salmonella*.

28 **Keywords:** *Salmonella*, genotyping, serogroup, CRISPR

## 29 INTRODUCTION

30 The first CRISPRs locus were identified over 25 years ago in *Escherichia coli* as ambiguous repeat  
31 (Ishino *et al.*, 1987) and are known as CRISPR spacer arrays now (Mojica *et al.*, 2000; Jansen *et al.*,  
32 2002a; 2002b). CRISPR arrays consists of tandem direct repeats (DRs) of 23 to 55 bp (base pair) in  
33 length interspaced by equal sized of variable spacer sequences that acquired from bacteriophages or  
34 plasmids (Bolotin *et al.*, 2005; Mojica *et al.*, 2005; Pourcel *et al.*, 2005; Boyaval *et al.*, 2007). The  
35 spacer in CRISPR locus was first applied to subtyping *Mycobacterium tuberculosis* strains and this  
36 method was known as spacer-oligonucleotide typing or “spoligotyping” (Groenen *et al.*, 1993;  
37 Kamerbeek *et al.*, 1997). Recently, the “next generation” microbead-spoligotyping method was  
38 applied to *Salmonella* in an assay named CRISPOL (for “CRISPR polymorphism”)(Fabre *et al.*, 2012).  
39 Fabre *et al.* (2012) state that there are at least three potential interest of using the polymorphism in  
40 *Salmonella* CRISPR locus for clinical microbiology or public health laboratories which are: 1. CRISPR  
41 sizing by PCR to compare different isolate of *Salmonella* spp. 2. CRISPOL assay to subtype *Salmonella*  
42 serotype Typhimurium or its monophasic variant. 3. Development of PCR assay to target specific  
43 *Salmonella* serotype or strain. We aimed to demonstrate that CRISPR based genotyping can be  
44 utilized as a diagnostic tool to differentiate different *Salmonella* serogroups prevalent in Sabah.

45

46

## 47 MATERIAL AND METHODS

### 48 Sample Collection

49 *Salmonella* samples (N=30) were obtained from the Diagnostic Veterinary Laboratory, Kota Kinabalu,  
50 Sabah. All the *Salmonella* samples were isolated from avian host. The *Salmonella* bacteria were  
51 cultured on nutrient agar and MacConkey agar. The MacConkey agar is a selective medium for  
52 *Salmonella* which functions to ensure that contaminants are eliminated. The *Salmonella* colony from  
53 nutrient agar were transferred to nutrient broth and cultured overnight in incubator shaker at 37°C  
54 and 200 rpm (revolutions per minute). The *Salmonella* samples were stored at 25% glycerol stock in  
55 -80°C freezer for future use.

### 56 Serogrouping

57 ELISA was carried out as follows. *Salmonella* were cultured overnight at nutrient agar by streak plate  
58 method at 37°C. 0.85% saline solution was used for the ELISA test. The ELISA test was done using the  
59 *Salmonella* Sero-Quick Group Kit from Statens Serum Institut, Denmark. The protocol for *Salmonella*  
60 ELISA test was done according to the manufacturer protocol.

### 61 DNA Extraction

62 DNA was extracted according to modified Kang *et al.* (1998) method. The dry DNA pellet was re-  
63 suspended in 100 µl of 1X TE (Tris-EDTA) buffer and stored in -20°C for future use.

### 64 PCR of *invA* gene

65 The primer pair used for this PCR were taken from Cortez *et al.* (2006). PCR was performed in a  
66 reaction volume of 25 µl using the GE Healthcare illustra™ puReTaq Ready-To-Go PCR Beads. The  
67 preparation of PCR master mix was prepared according to manufacturer protocol. Amplification was  
68 carried out in a thermal cycler (MJ Research PTC-200 Peltier Thermal Cycler) using 35 cycles  
69 consisting of denaturation for 30 sec at 94°C, annealing for 1 min at 55°C, and extension for 1 min at

70 72°C, followed by a final extension for 7 min at 72°C. Electrophoresis of amplified products was  
71 carried out using 1.0% agarose gel in 1X TBE (Tris/Borate/EDTA) running buffer. The amplified DNA  
72 fragments were stained with ethidium bromide and visualized under UV (ultraviolet) light. A 100 bp  
73 DNA ladder (New England Biolabs Quick-Load 100 bp DNA Ladder) was used as a reference standard.

#### 74 **Primer Design**

75 Design of CRISPR specific primers was carried out as follows. The complete genome of *Salmonella*  
76 *enterica* subsp. *enterica* serovar Typhi strain CT18 was first retrieved from the NCBI (National Centre  
77 for Biotechnology Information) with accession number of NC\_003198.1. The genome was then  
78 analyzed for presence of CRISPR locus using online web tool called CRISPERFinder at [http://crispr.u-](http://crispr.u-psud.fr/Server/CRISPRfinder.php)  
79 [psud.fr/Server/CRISPRfinder.php](http://crispr.u-psud.fr/Server/CRISPRfinder.php). Once the CRISPR locus sequence was identified three pairs of  
80 primer set were designs to amplify the CRISPR 1 and CRISPR 2 locus presence in *Salmonella* genome  
81 using online web tool called Primer3 at <http://bioinfo.ut.ee/primer3-0.4.0/>. The primer sequences  
82 are listed in Table 1.0.

#### 83 **PCR of CRISPR Locus**

84 PCR was performed in a reaction volume of 20 µl containing 1X Dream Taq. Green Buffer (Thermo  
85 Scientific), 0.1 mM dNTPs (deoxynucleoside triphosphate), 2 mM MgCl<sub>2</sub> (Magnesium chloride), 5 µM  
86 of forward and reverse primer, 1 Unit of Thermo Scientific Dream Taq DNA polymerase and 1 µl of  
87 DNA template. Amplification was carried out in a thermal cycler (MJ Research PTC-200 Peltier  
88 Thermal Cycler) with initial denaturation of 96°C for 4 min, followed by 35 cycles of 96°C for 30 sec,  
89 51°C for 30 sec, 72°C for 1 min and final extension step at 72°C for 2 min. All steps were the same for  
90 all primers except for the annealing temperature. The annealing temperature for CRISPR1 primer pair  
91 is 48°C, 51°C for CRISPR2 primer pair and 49°C for FARH primer pair. Electrophoresis of amplified  
92 products was carried out using 1.0% agarose gel in 1X TBE running buffer. The amplified DNA  
93 fragments were stained with ethidium bromide and visualized under UV light. A 100 bp DNA ladder  
94 (New England Biolabs Quick-Load 100 bp DNA Ladder) was used as a reference standard.

## 95 RESULTS

96 *Salmonella* samples (N=30) were test by ELISA for serogrouping. 53% of the samples were from  
97 serogroup C, followed by serogroup E with 20%, 17% for serogroup B and 10% for serogroup D. The  
98 genus confirmations for all the samples were done by the PCR of *invA* gene (Figure 1.0, 2.0 and 3.0).  
99 The expected size for the PCR product is 521 bp. PCR to amplify the CRISPR locus on *Salmonella*  
100 genome were done to differentiate the different *Salmonella* serogroups (Figure 4.0, 5.0 and 6.0).

## 101 DISCUSSION

102 The O antigen present in the cell surface of *Salmonella* is extremely polymorphic and is used to  
103 determine the bacteria serogroup (Bee & Kwai, 2009). The variation in O antigen structure is due to  
104 the different types of sugar present, the arrangement of sugars, the addition of branch sugars and  
105 the modifying side groups in which such variation is used to serogroup *Salmonella* isolates ( Wyk &  
106 Reeves, 1989; Fitzgerald *et al.*, 2003; Luk *et al.*, 2006). In this study four serogroups were found  
107 which were serogroup B, C, D and E. This finding is similar with the finding of Lindberg & Le Minor  
108 (1984) and Luk & Lindberg (1991) that stated over than 95% of the *Salmonella* strains that cause  
109 infection in human and animal is originate from the serogroup A to E. The identity of the *Salmonella*  
110 samples recruited for this study was confirmed by the present of *invA* gene in *Salmonella* genome  
111 using PCR method. This was done in order to ensure that all the samples used in this study were from  
112 the pure culture of *Salmonella* bacteria. PCR was an effective, rapid, reliable and sensitive method  
113 for the detection of *invA* gene present in *Salmonella* genome (Zahraei-Salehi *et al.*, 2006). A study  
114 from Galán & Curtiss (1989) show that a group of genes (*invA*, *B*, *C*, *D*) confer *Salmonella* the ability to  
115 invade cultured epithelial cells. The use of this gene for *Salmonella* identification by PCR method has  
116 recently been suggested as this gene were shown to be found in a number of *Salmonella* strain  
117 (Galán & Curtiss, 1991). A study by Zahraei-Salehi *et al.* (2006) confirm that the *invA* gene sequence is  
118 unique to *Salmonella* and this unique sequence can be used as the PCR target to differentiate  
119 *Salmonella* from other organisms. The CRISPR typing was done to differentiate *Salmonella* serogroup

120 by molecular method and the result was compared with the traditional serogrouping by ELISA  
121 method. The amplification profile of *Salmonella* from different serogroups were observed and  
122 compared. The principle of this method is that the variation in spacer number that interspaced  
123 between the direct repeats will give different lengths of CRISPR array and can be used to rapidly  
124 screen *Salmonella* isolates by PCR and gel electrophoresis analysis (Shariat & Dudley, 2014). The  
125 CRISPR1 and CRISPR2 primer pairs failed to differentiate some of the samples when compared to the  
126 serogrouping result obtained by the ELISA method. Depending on the antibody use for ELISA test,  
127 they may lack specificity because of the non-specific agglutination that might happen in some  
128 *Salmonella* bacteria as stated by Cheesbrough & Donnelly (1996). Only the CRISPR primer designated  
129 as FARH primer was able to completely differentiate all the samples from different serogroups. The  
130 reason why CRISPR1 and CRISPR2 primer cannot resolve the serogroup while FARH primer can might  
131 be because of the location of the primer along the CRISPR gene. The positions of forward and reverse  
132 primer for CRISPR1 along the gene are at nucleotide number 2,925,620 to 2,925,640 and 2,926,778  
133 to 2,926,798 respectively. For CRISPR2 the positions of the forward and reverse primer along the  
134 gene are at nucleotide number 2,926,215 to 2,926,233 and 2,926,450 to 2,926,470 respectively. For  
135 the FARH the positions of forward and reverse primer along the gene are at nucleotide number  
136 2,926,294 to 2,926,313 and 2,926,450 to 2,926,470 respectively. It can be seen from the results that  
137 some samples from the same serogroup have different amplification profile. This might be because  
138 of in one serogroup there were sub-group present as shown in White-Kauffmann-Le-Minor scheme  
139 (Grimont & Weill, 2008). Our findings are consistent with those obtained by Fabre *et al.* (2012) and  
140 Shariat & Dudley (2014) who used rapid CRISPR size typing to screen *Salmonella* spp. isolates by  
141 comparing the amplicon size of PCR product run on agarose gel electrophoresis.

142

## 143 **CONCLUSION**

144 From this study, it shown that only the FARH primer is able to resolve the samples into their  
145 respective serogroup. The serogrouping by ELISA method can be complement with CRISPR typing by

146 PCR method to get more accurate result as non-specific agglutination might occur using the ELISA  
147 method.

## 148 **ACKNOWLEDGEMENTS**

149 We would like to thank UMS (Universiti Malaysia Sabah) for supporting this project under the  
150 UMSGreat grant with code project of GUG0106-1/2017. We also would like to thank the Veterinary  
151 Laboratory, Kota Kinabalu, Sabah for providing us the *Salmonella* samples used in this study.

## 152 **REFERENCES**

153 **Bee, K. L. and Kwai, L. T. (2009).** Application of PCR-based serogrouping of selected *Salmonella*  
154 serotypes in Malaysia. *Journal of Infection in Developing Countries* **3(6)**, 420–428.

155 **Bolotin, A., Quinquis, B., Sorokin, A. and Dusko Ehrlich, S. (2005).** Clustered regularly interspaced  
156 short palindrome repeats (CRISPRs) have spacers of extrachromosomal origin. *Microbiology*  
157 **151(8)**, 2551–2561.

158 **Boyaval, P., Moineau, S., Romero, D. A. and Horvath, P. (2007).** Against Viruses in Prokaryotes.  
159 *Science* **315**, 1709–1712.

160 **Cheesbrough, S. and Donnelly, C. (1996).** The use of a rapid *Salmonella* latex serogrouping test  
161 (Spectate<sup>®</sup>) to assist in the confirmation of ELISA-based rapid *Salmonella* screening tests.  
162 *Letters in Applied Microbiology* **22(5)**, 378–380.

163 **Cortez, A. L. L., Carvalho, A. C. F. B., Ikuno, A. A., Bürger, K. P. and Vidal-Martins, A. M. C. (2006).**  
164 Identification of *Salmonella* spp. isolates from chicken abattoirs by multiplex-PCR. *Research in*  
165 *Veterinary Science* **81(3)**, 340–344.

166 **Fabre, L., Zhang, J., Guigon, G., Le Hello, S., Guibert, V., Accou-Demartin, M., de Romans, S., Lim, C.,**  
167 **Roux, C., Passet, V., Diancourt, L., Guibourdenche, M., Issenhuth-Jeanjean, S., Achtman, M.,**  
168 **Brisse, S., Sola, C. and Weill, F.X. (2012).** Crispr typing and subtyping for improved Laboratory

- 169 surveillance of *Salmonella* infections. *PLoS ONE* **7(5)**, e36995.
- 170 **Fitzgerald, C., Sherwood, R., Gheesling, L. L., Brenner, F. W. and Fields, P. I. (2003).** Molecular  
171 Analysis of the rfb O Antigen Gene Cluster of *Salmonella enterica* Serogroup O : 6 , 14 and  
172 Development of a Serogroup-Specific PCR Assay. *Applied and Environmental Microbiology*  
173 **69(10)**, 6099–6105.
- 174 **Galán, J. E. and Curtiss, R. (1989).** Cloning and molecular characterization of genes whose products  
175 allow *Salmonella* Typhimurium to penetrate tissue culture cells. *Proc. Natl. Acad. Sci. USA* **86**,  
176 **6383–6387**.
- 177 **Galán, J. E. and Curtiss, R. (1991).** Distribution of the *invA*, -B, -C, and -D genes of *Salmonella*  
178 Typhimurium among other *Salmonella* serovars: *invA* mutants of *Salmonella* Typhi are deficient  
179 for entry into mammalian cells. *Infection and Immunity* **59(9)**, 2901–2908.
- 180 **Grimont, P. and Weill, F. X. (2008).** Antigenic formulae of the *Salmonella* serovars. *WHO*  
181 *Collaborating Centre for Reference and Research on Salmonella*, 1–167. Retrieved from  
182 [http://www.pasteur.fr/ip/portal/action/WebdriveActionEvent/oid/01s-000036-](http://www.pasteur.fr/ip/portal/action/WebdriveActionEvent/oid/01s-000036-089%5Cnpapers2://publication/uuid/CA3447A0-61BF-4D62-9181-C9BA78AF0312)  
183 [089%5Cnpapers2://publication/uuid/CA3447A0-61BF-4D62-9181-C9BA78AF0312](http://www.pasteur.fr/ip/portal/action/WebdriveActionEvent/oid/01s-000036-089%5Cnpapers2://publication/uuid/CA3447A0-61BF-4D62-9181-C9BA78AF0312)
- 184 **Groenen, P. M. A., Bunschoten, A. E., Soolingen, D. V. and Erftbden, J. D. A. V. (1993).** Nature of  
185 DNA polymorphism in the direct repeat cluster of *Mycobacterium tuberculosis*; application for  
186 strain differentiation by a novel typing method. *Molecular Microbiology* **10(5)**, 1057–1065.
- 187 **Ishino, Y., Shinagawa, H., Makino, K., Amemura, M. and Nakata, A. (1987).** Nucleotide sequence of  
188 the *iap* gene, responsible for alkaline phosphatase isozyme conversion in *Escherichia coli*, and  
189 identification of the gene product. *Journal of Bacteriology* **169(12)**, 5429–5433.
- 190 **Jansen, R., van Embden, J. D. A., Gastra, W. and Schouls, L. M. (2002a).** Identification of genes that  
191 are associated with DNA repeats in prokaryotes. *Molecular Microbiology* **43(6)**, 1565–1575.



- 192 **Jansen, R., van Embden, J. D. A., Gastra, W. and Schouls, L. M. (2002b).** Identification of a novel  
193 family of sequence repeats among prokaryotes. *Omic* **6(1)**, 23–33.
- 194 **Kamerbeek, J., Schouls, L., Kolk, A., Agterveld, M. V., Soolingen, D.V., Kuijper, S., Bunschoten, A.,**  
195 **Molhuizen, H., Shaw, R., Goyal, M. and Embden, J.V. (1997).** Simultaneous detection and strain  
196 differentiation of *Mycobacterium tuberculosis* for diagnosis and epidemiology. *Journal of*  
197 *Clinical Microbiology* **35(4)**, 907–914.
- 198 **Kang, H. W., Cho, Y. G., Yoon, U. H. and Eun, M. Y. (1998).** A rapid DNA extraction method for RFLP  
199 and PCR analysis from a single dry seed. *Plant Molecular Biology Reporter* **16**, 1–9.
- 200 **Lindberg, A. A. and Le Minor, L. (1984).** Serology of *Salmonella*. *Methods in Microbiology* **15**, 1–141.
- 201 **Luk, J. M. C., Kongmuang, U., Reeves, P. R. and Lindberg, A. A. (2006).** Selective amplification of  
202 abequose and paratose synthase genes ( *rfb* ) by polymerase chain reaction for identification of  
203 *Salmonella* major serogroups ( A , B , C2 , and D ). *Journal of Clinical Microbiology* **31(8)**, 2118–  
204 **2123.**
- 205 **Luk, J. M. C. and Lindberg, A. A. (1991).** Anti-*Salmonella* lipopolysaccharide monoclonal antibodies:  
206 Characterization of *Salmonella* BO-, CO-, DO-, and EO-specific clones and their diagnostic  
207 usefulness. *Journal of Clinical Microbiology* **29(11)**, 2424–2433.
- 208 **Mojica, F. J. M., Díez-Villaseñor, C., García-Martínez, J. and Soria, E. (2005).** Intervening sequences  
209 of regularly spaced prokaryotic repeats derive from foreign genetic elements. *Journal of*  
210 *Molecular Evolution* **60(2)**, 174–182.
- 211 **Mojica, F. J. M., Díez-Villaseñor, C., Soria, E. and Juez, G. (2000).** Biological significance of a family of  
212 regularly spaced repeats in the genomes of Archaea, Bacteria and mitochondria. *Molecular*  
213 *Microbiology* **36(1)**, 244–246.
- 214 **Pourcel, C., Salvignol, G. and Vergnaud, G. (2005).** CRISPR elements in *Yersinia pestis* acquire new

215 repeats by preferential uptake of bacteriophage DNA, and provide additional tools for  
216 evolutionary studies. *Microbiology* **151(3)**, 653–663.

217 **Shariat, N. and Dudley, E. G. (2014).** CRISPRs : Molecular Signatures Used for Pathogen Subtyping.  
218 *Applied and Environmental Microbiology* **80(2)**, 430–439.

219 **Wyk, P. and Reeves, P. (1989).** Identification and sequence of the gene for abequoise synthase, which  
220 confers antigenic specificity on group B salmonellae: Homology with galactose epimerase.  
221 *Journal of Bacteriology* **171(10)**, 5687–5693.

222 **Zahraei-Salehi, M.T., Mahzoniae, M. R. and Ashrafi, A. (2006).** Amplification of *invA* gene of  
223 *Salmonella* by polymerase chain reaction (PCR) as a specific method for detection of  
224 Salmonellae. *Journal of Veterinary Research* **61(2)**, 195–199.

225

226

227

228

229

230

231

232

233

234

235

236 **Attachments (Figures and Table)**

| PRIMER NAME    | Forward Primer (5'-3')     | Reverse Primer (5'-3')      | Annealing Temperature (Ta) |
|----------------|----------------------------|-----------------------------|----------------------------|
| <b>CRISPR1</b> | ATT CGT TTT ATC GCC ACC AG | CTG GCA GA T GAG GGA AAT GT | 48°C                       |
| <b>CRISPR2</b> | AGC AAC CCG TGT CGG ATA    | CGC AAC CG G TGT TTT AGT GT | 51°C                       |
| <b>FARH</b>    | GCG TGA AT T GCG GTT TAT C | CGC AAC CG G TGT TTT AGT GT | 49°C                       |

237 **Table 1.0** List of primer used for the CRISPR typing.

238

239

240

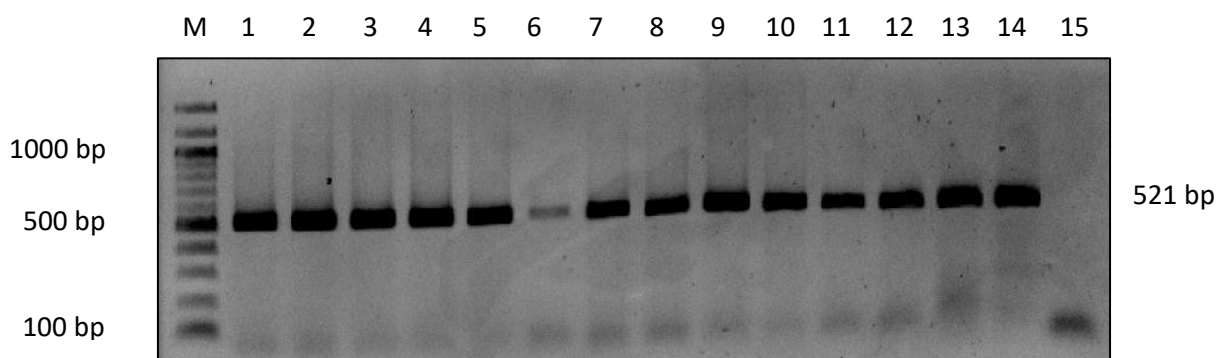

241

242 **Figure 1.0** PCR was done to amplify the *invA* gene on the *Salmonella* bacteria genome for

243 genus confirmation. Lane M: 100 bp marker, lane 1 to 14: The PCR product of *Salmonella*

244 *invA* gene and lane 15: Negative control without DNA template.

245

246

247

248

249

250

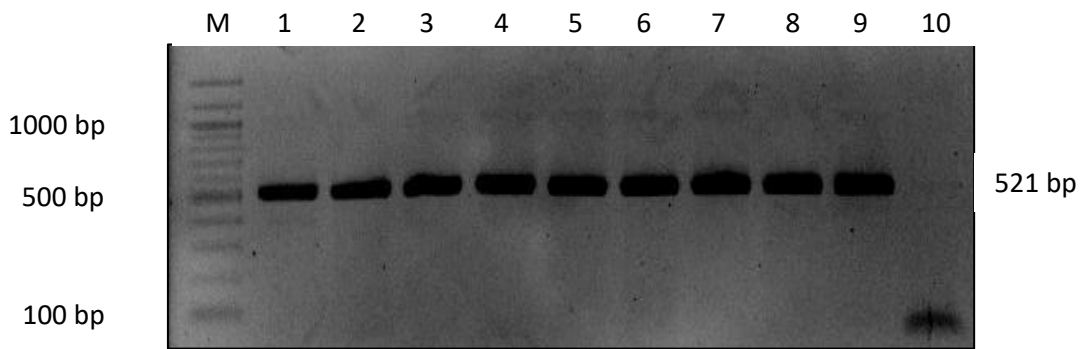

251

252

**Figure 2.0** PCR was done to amplify the *invA* gene on the *Salmonella* bacteria

253

genome for genus confirmation. Lane M: 100 bp marker, lane 1 to 9: The PCR

254

product of *Salmonella invA* gene and lane 10: Negative control without DNA

255

template.

256

257

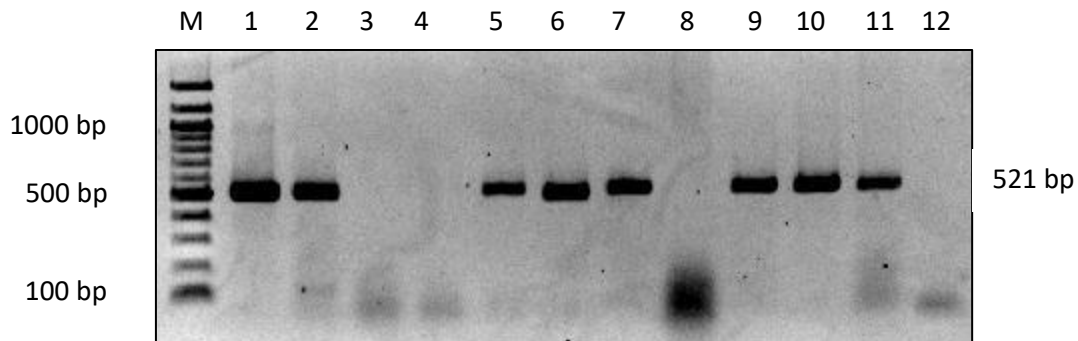

258

259

**Figure 3.0** PCR was done to amplify the *invA* gene on the *Salmonella* bacteria

260

genome for genus confirmation. Lane M: 100 bp marker, lane 1 to 11: The PCR

261

product of *Salmonella invA* gene and lane 12: Negative control without DNA

262

template.

263

264

265

266

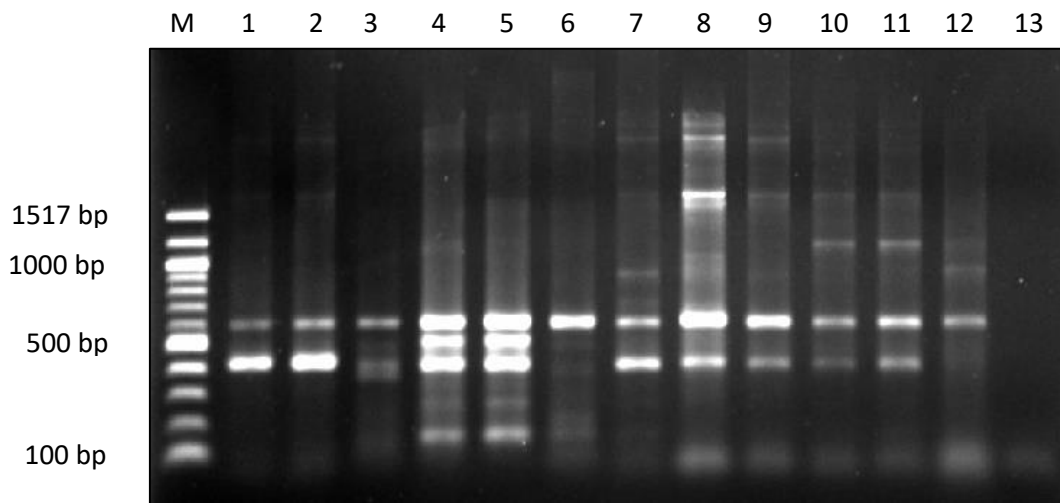

267

268 **Figure 4.0** CRISPR1 primer pair was designed for PCR to amplify the CRISPR locus in *Salmonella*  
269 genome for serogrouping differentiation by molecular method. The above agarose gel picture show  
270 the amplification profile when *Salmonella* genome was tested with the designed primer. Lane M: 100  
271 bp marker, lane1-3: *Salmonella* from serogroup B, lane 4-6: *Salmonella* from serogroup C, lane 7-9:  
272 *Salmonella* from serogroup D, lane 10-12: *Salmonella* from serogroup E and lane 13: Negative control  
273 without DNA template.

274

275

276

277

278

279

280

281

282

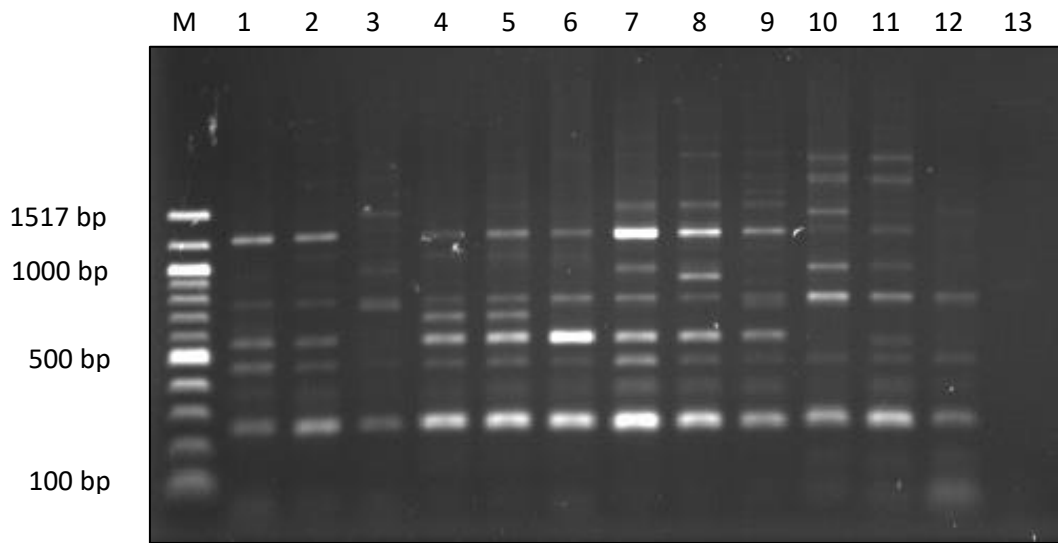

283

284 **Figure 5.0** CRISPR2 primer pair was designed for PCR to amplify the CRISPR locus in *Salmonella*  
285 genome for serogrouping differentiation by molecular method. The above agarose gel picture show  
286 the amplification profile when *Salmonella* genome was tested with the designed primer. Lane M: 100  
287 bp marker, lane1-3: *Salmonella* from serogroup B, lane 4-6: *Salmonella* from serogroup C, lane 7-9:  
288 *Salmonella* from serogroup D, lane 10-12: *Salmonella* from serogroup E and lane 13: Negative control  
289 without DNA template.

290

291

292

293

294

295

296

297

298

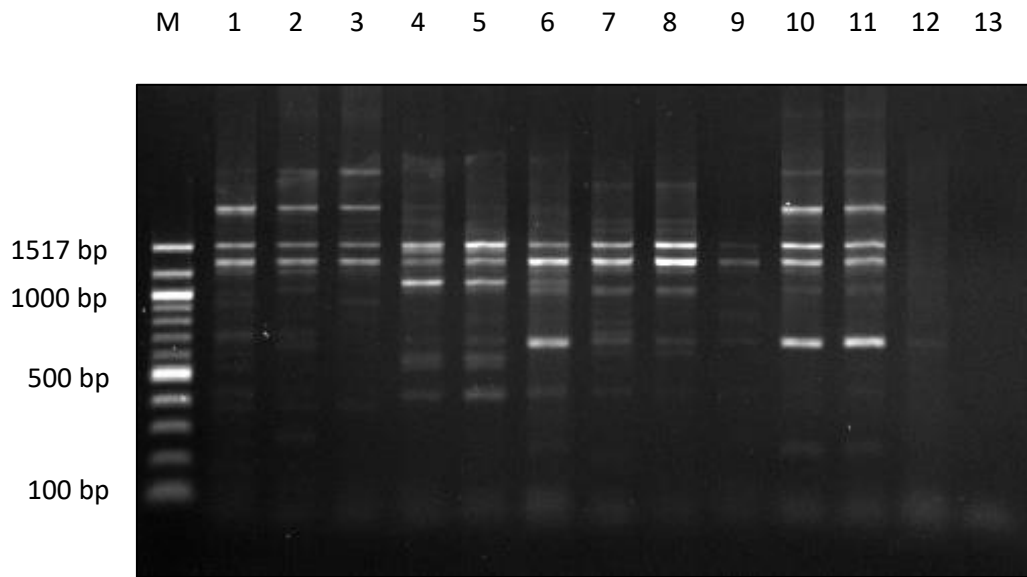

299

300 **Figure 6.0** FARH primer pair was designed for PCR to amplify the CRISPR locus in *Salmonella* genome  
301 for serogrouping differentiation by molecular method. The above agarose gel picture show the  
302 amplification profile when *Salmonella* genome was tested with the designed primer. Lane M: 100 bp  
303 marker, lane1-3: *Salmonella* from serogroup B, lane 4-6: *Salmonella* from serogroup C, lane 7-9:  
304 *Salmonella* from serogroup D, lane 10-12: *Salmonella* from serogroup E and lane 13: Negative control  
305 without DNA template.

306

307
